# Supplementary material for: A Case–Control Study to Evaluate Environmental and Lifestyle Risk Factors for Esophageal Cancer in Tanzania
Source: Oxford University Press journal article supplement (doi:10.1158/1055-9965.epi-20-0660), 2020-11-03
Supplement: 10559965epi200660-sup-242531_3_supp_6627400_qhs3ls.docx [file 10559965epi200660-sup-242531_3_supp_6627400_qhs3ls.docx]

**SupplementaryTable 1. The associations of socioeconomic factors with esophageal cancer**

|  | **471 Cases** | **471 Controls** | **OR** a | **p-value** b | **adj OR** c | **adj p-value** d |
| --- | --- | --- | --- | --- | --- | --- |
|  | **N (%)** | **N (%)** | **(95% CI)** |  | **(95% CI)** |  |
| **Electricity** |  |  |  | <0.001 |  | <0.001 |
| Yes | 193 (41.0) | 319 (67.7) | 0.30 (0.22, 0.41) |  | 0.34 (0.25, 0.47) |  |
| No | 278 (59.0) | 152 (32.3) | 1 |  | 1 |  |
| **Indoor toilet** |  |  |  | <0.001 |  | <0.001 |
| Yes | 103 (21.9) | 204 (43.3) | 0.34 (0.25, 0.46) |  | 0.36 (0.26, 0.51) |  |
| No | 367 (77.9) | 266 (56.5) | 1 |  | 1 |  |
| Unknown | 1 (<1) | 1 (<1) |  |  |  |  |
| **Television** |  |  |  | <0.001 |  | <0.001 |
| Yes | 125 (26.5) | 272 (57.7) | 0.23 (0.16, 0.32) |  | 0.26 (0.18, 0.37) |  |
| No | 346 (73.5) | 199 (42.3) | 1 |  | 1 |  |
| **Radio** |  |  |  | <0.001 |  | <0.001 |
| Yes | 269 (57.1) | 356 (75.6) | 0.40 (0.30, 0.55) |  | 0.43 (0.31, 0.60) |  |
| No | 200 (42.5) | 114 (24.2) | 1 |  | 1 |  |
| Unknown | 2 (<1) | 1 (<1) |  |  |  |  |
| **Washing machine** |  |  |  | 0.031 |  | 0.076 |
| Yes | 7 (1.5) | 19 (4.0) | 0.37 (0.15, 0.88) |  | 0.46 (0.19, 1.13) |  |
| No | 464 (98.5) | 450 (95.5) | 1 |  | 1 |  |
| Unknown | 0 | 2 (<1) |  |  |  |  |
| **Refrigerator** |  |  |  | <0.001 |  | <0.001 |
| Yes | 101 (21.4) | 212 (45.0) | 0.30 (0.22, 0.42) |  | 0.34 (0.24, 0.48) |  |
| No | 369 (78.3) | 259 (55.0) | 1 |  | 1 |  |
| Unknown | 1 (<1) | 0 |  |  |  |  |
| **Cell phone** |  |  |  | 0.003 |  | 0.003 |
| Yes | 352 (74.7) | 387 (82.2) | 0.59 (0.41, 0.83) |  | 0.57 (0.39, 0.83) |  |
| No | 118 (25.1) | 83 (17.6) | 1 |  | 1 |  |
| Unknown | 1 (<1) | 1 (<1) |  |  |  |  |
| **Brick or cement walls** |  |  |  | 0.002 |  | 0.017 |
| Yes | 292 (62.0) | 339 (72.0) | 0.64 (0.48, 0.85) |  | 0.69 (0.50, 0.94) |  |
| No | 174 (36.9) | 126 (26.8) | 1 |  | 1 |  |
| Unknown | 5 (1.1) | 6 (1.3) |  |  |  |  |
| **Highest education** |  |  |  | <0.001 |  | <0.001 |
| College or university | 21 (4.5) | 52 (11.0) | 0.17 (0.02, 1.38) |  | 0.17 (0.08, 0.34) |  |
| Secondary (includes Form 6) | 39 (8.3) | 99 (21.0) | 0.07 (0.01, 0.50) |  | 0.16 (0.09, 0.30) |  |
| Primary (some or all) | 317 (67.3) | 272 (57.7) | 0.54 (0.34, 0.83) |  | 0.45 (0.29, 0.71) |  |
| None | 92 (19.5) | 48 (10.2) | 1 |  | 1 |  |
| Unknown | 2 (<1) | 0 |  |  |  |  |
| **Annual household income** |  |  |  | <0.001 |  | <0.001 |
| >1,200,000 TZS e | 107 (22.7) | 196 (41.6) | 0.33 (0.13, 0.84) |  | 0.21 (0.11, 0.41) |  |
| 900,001-1,200,000 TZS | 79 (16.8) | 58 (12.3) | 0.31 (0.10, 0.94) |  | 0.45 (0.23, 0.88) |  |
| 500,001-900,000 TZS | 85 (18.0) | 63 (13.4) | 0.50 (0.20, 1.24) |  | 0.65 (0.33, 1.26) |  |
| <=500,000 TZS | 80 (17.0) | 50 (10.6) | 1 |  | 1 |  |
| Unknown | 120 (25.5) | 104 (22.1) |  |  |  |  |

a Unadjusted odds ratio (OR) and its 95% confidence interval (CI) calculated based on Cochran-Mantel-Haenszel method stratified by matched case-control pair.

b P-value of unadjusted association test by Cochran-Mantel-Haenszel test. Comparisons do not reflect the unknown groups.

c Region-adjusted odds ratio (adj OR) and its 95% CI based on conditional logistic regression model stratified by matched case-control pair.

d P-value of region-adjusted association test (adj p) by likelihood ratio test using the conditional logistic regression model. Comparisons do not reflect the unknown groups.

e TZS= Tanzanian shillings.
