# Supplementary material for: A Case–Control Study to Evaluate Environmental and Lifestyle Risk Factors for Esophageal Cancer in Tanzania
Source: Oxford University Press journal article supplement (doi:10.1158/1055-9965.epi-20-0660), 2020-11-03

**Supplementary Figure 1. Odds ratio and 95% confidence intervals for independent risk factors for esophageal squamous cell carcinoma in Tanzania as determined by multivariate regression model on the subset of case-control pairs with pathologically confirmed cases (n=209).**

OR=odds ratio. LCL=lower 95% Wald confidence limit. UCL=upper 95% Wald confidence limit.


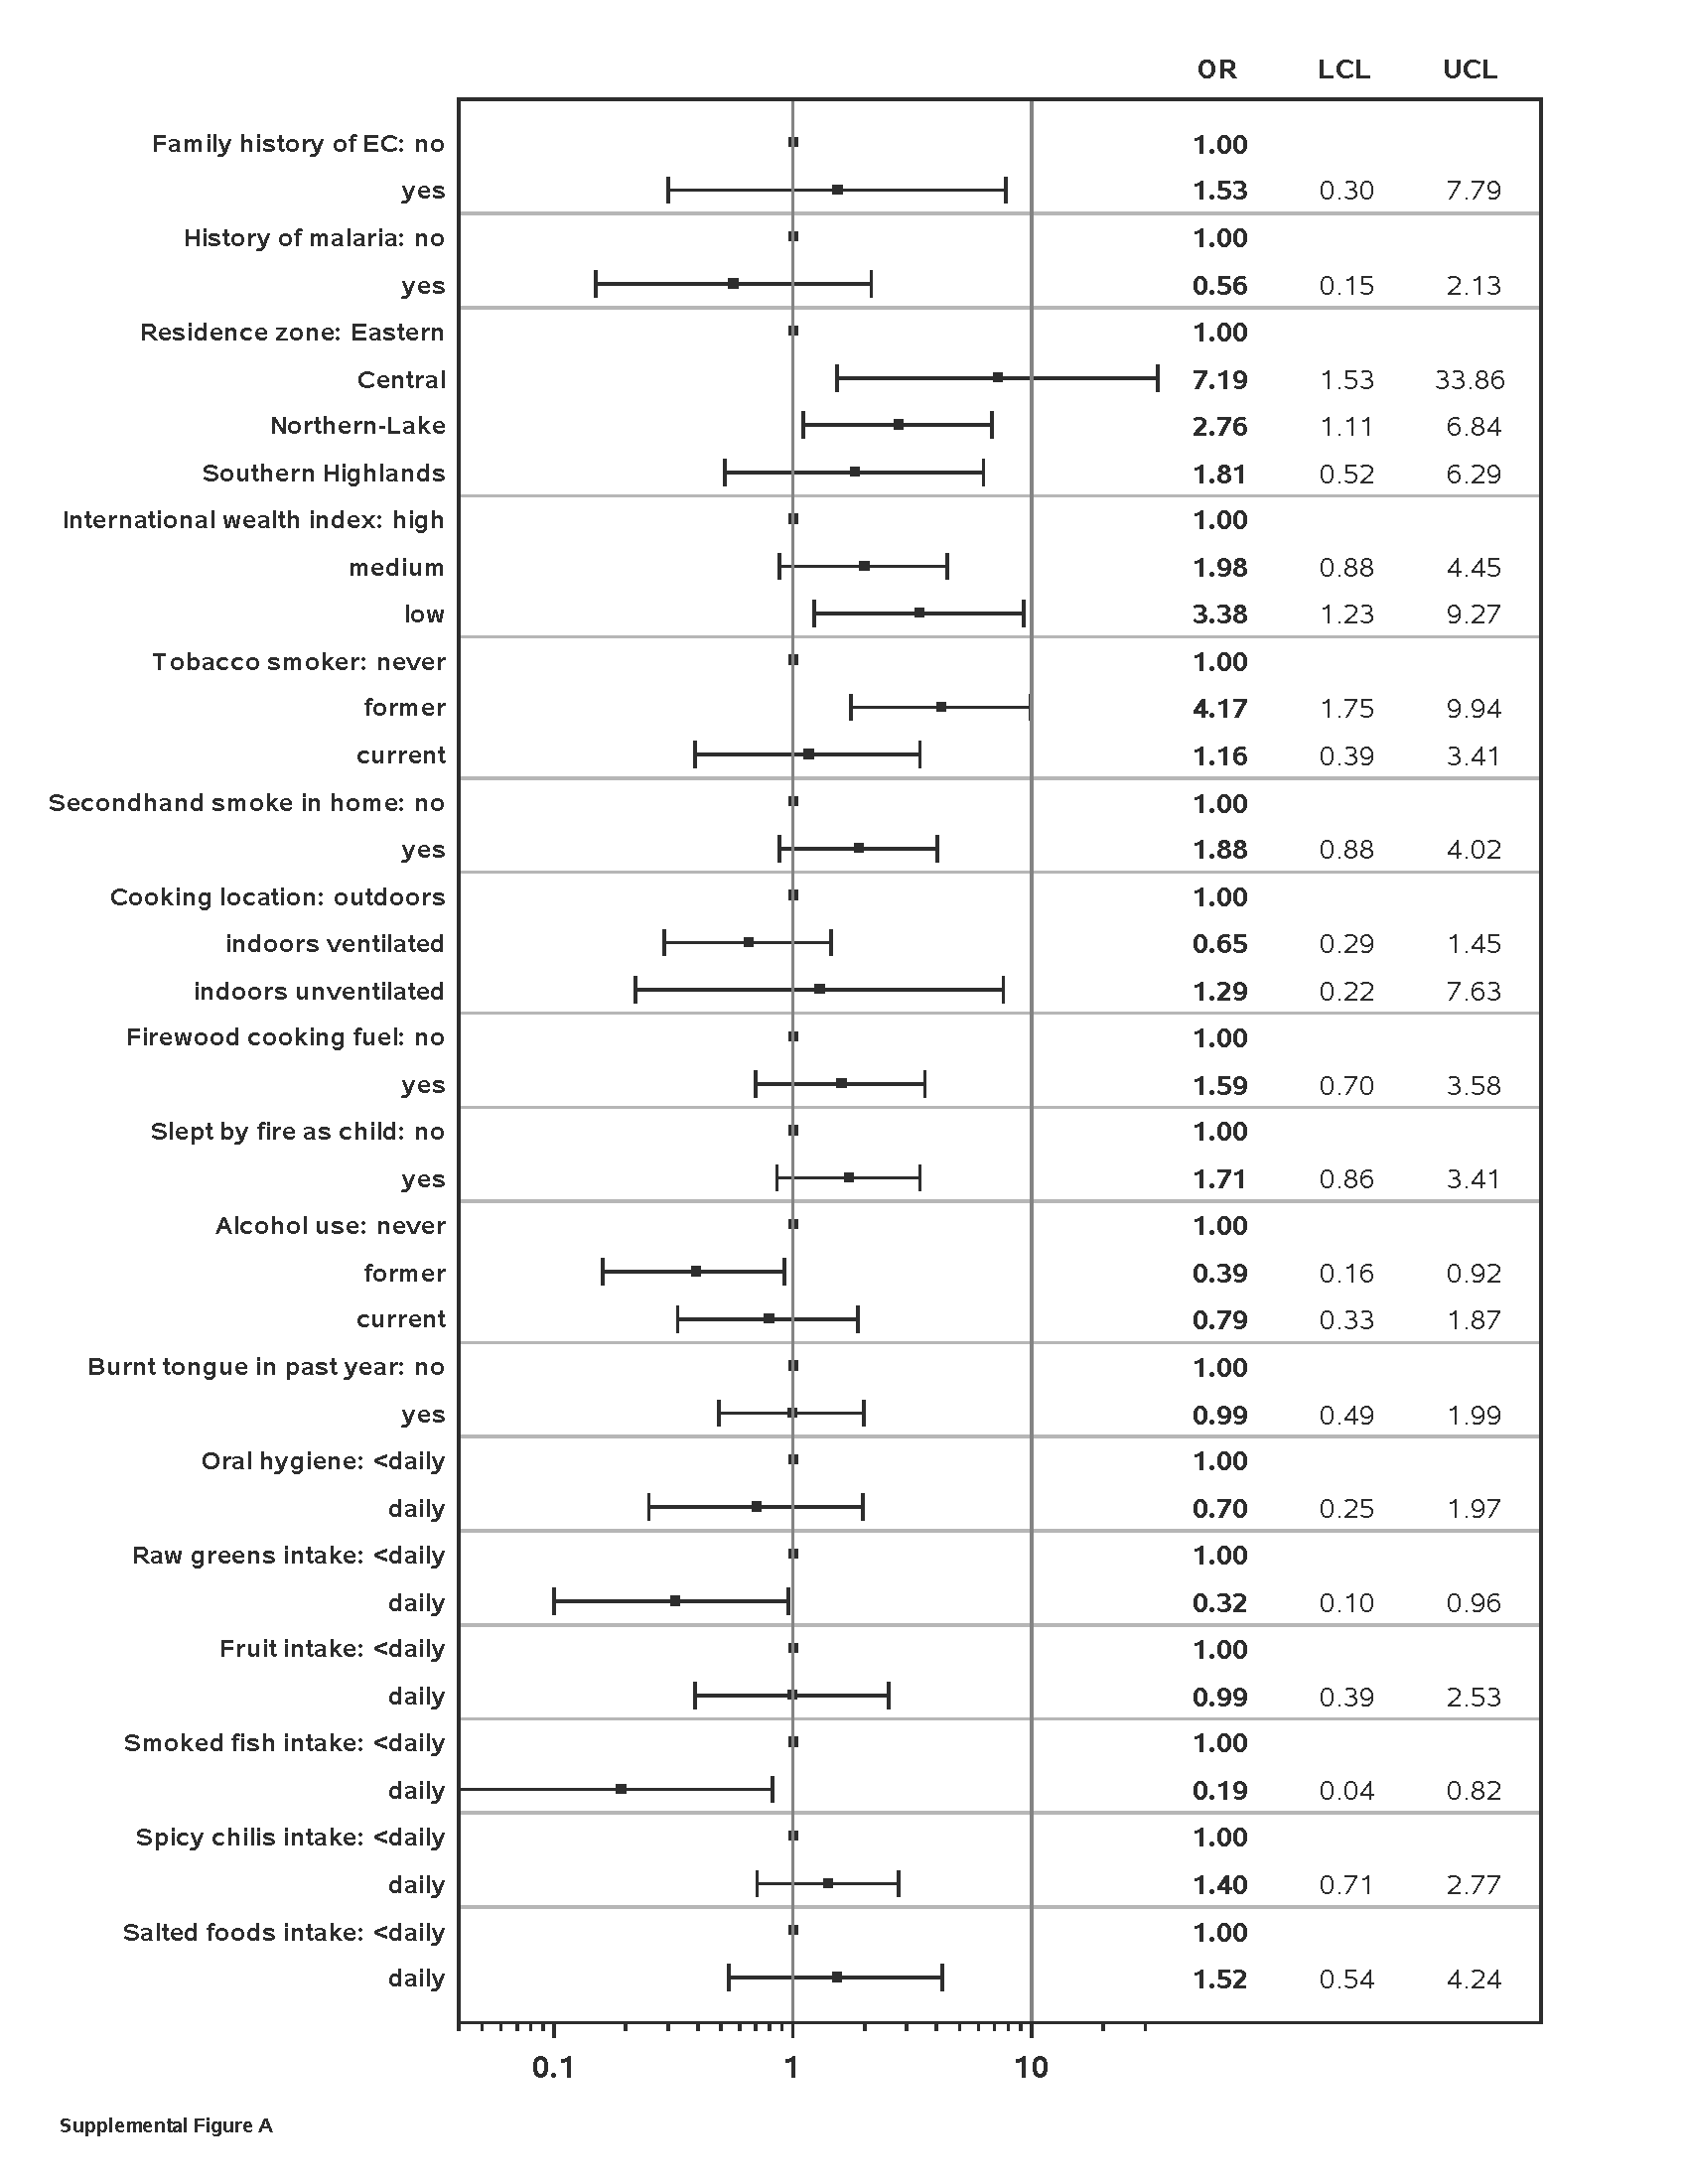

Supplement: 10559965epi200660-sup-242531_3_supp_6655280_q1brww.docx [file 10559965epi200660-sup-242531_3_supp_6655280_q1brww.docx]
